# Supplementary figures and images for: A 3-step Mechanical Digestion Method to Harvest Adipose-derived Stromal Vascular Fraction
Source: PubMed Central journal article supplement — Plast Reconstr Surg Glob Open. 2020 Feb 27;8(2):e2652. doi: 10.1097/GOX.0000000000002652 (PMC7159941; doi:10.1097/gox.0000000000002652), 2020-02-27

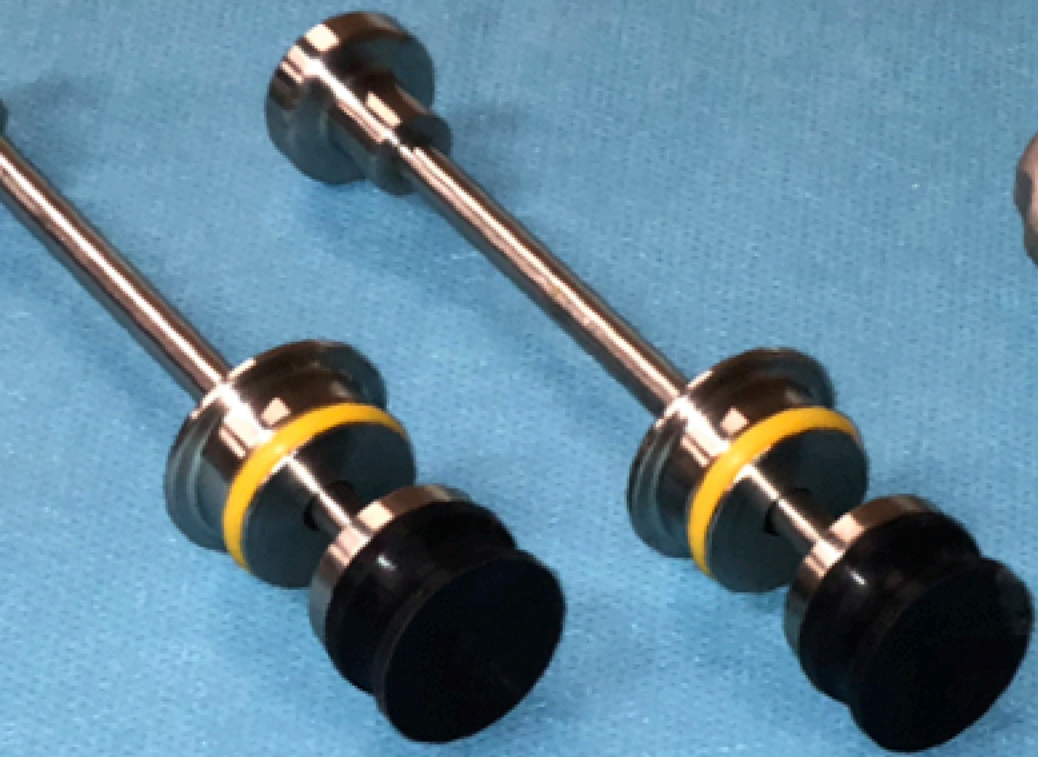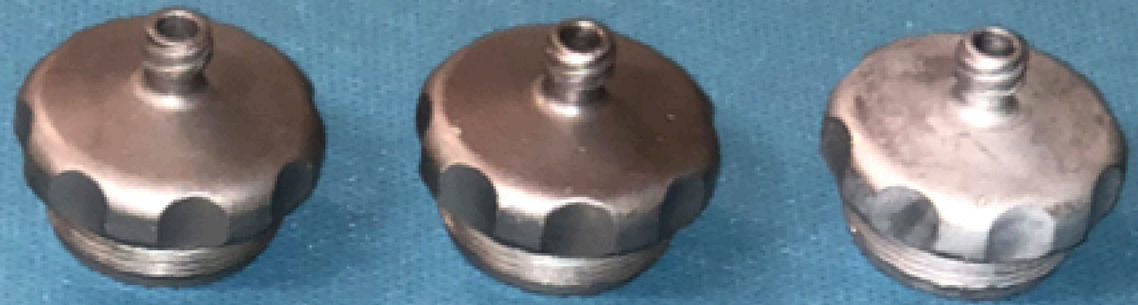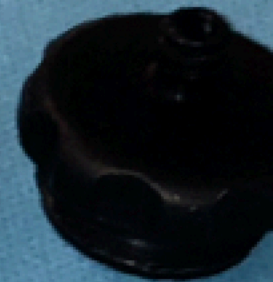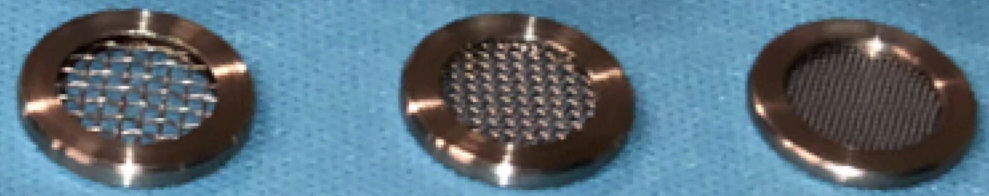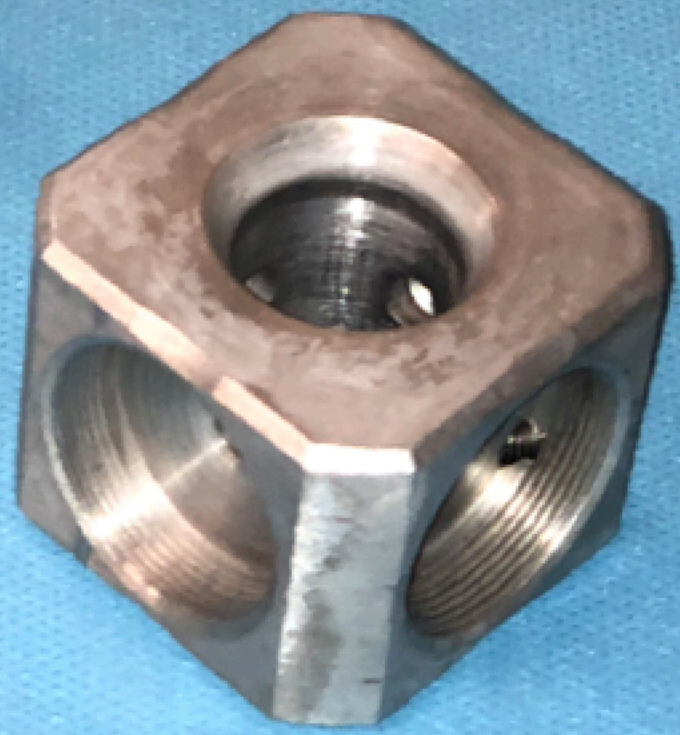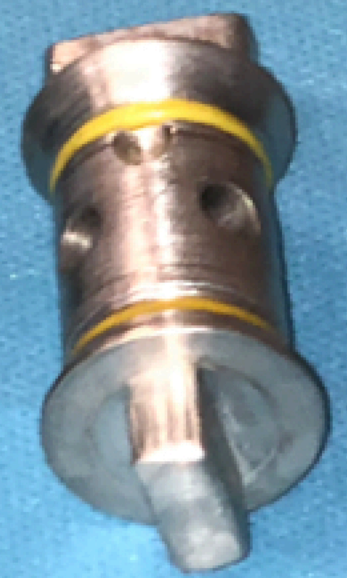

Supplement: gox-8-e2652-s002.pdf [file gox-8-e2652-s002.pdf]

**Mechanical Isolation**

**Day 7**

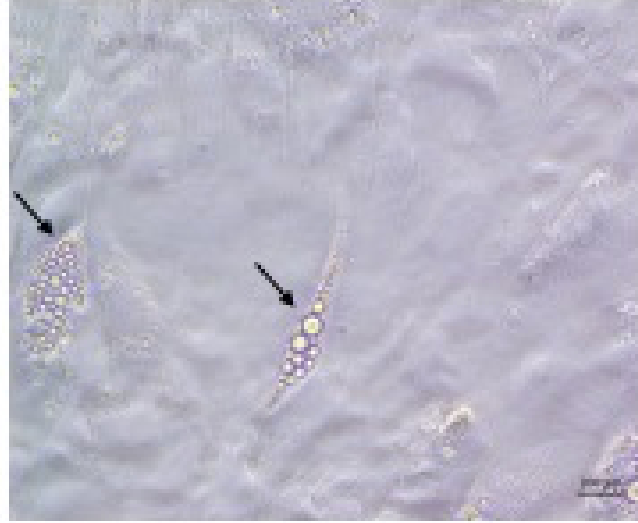

**Day 14**

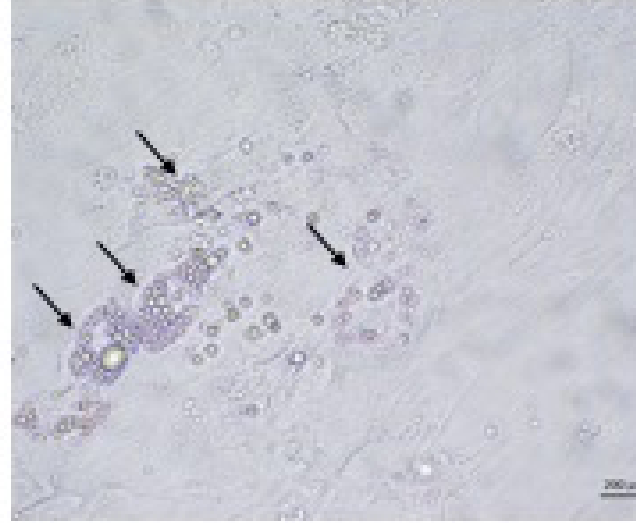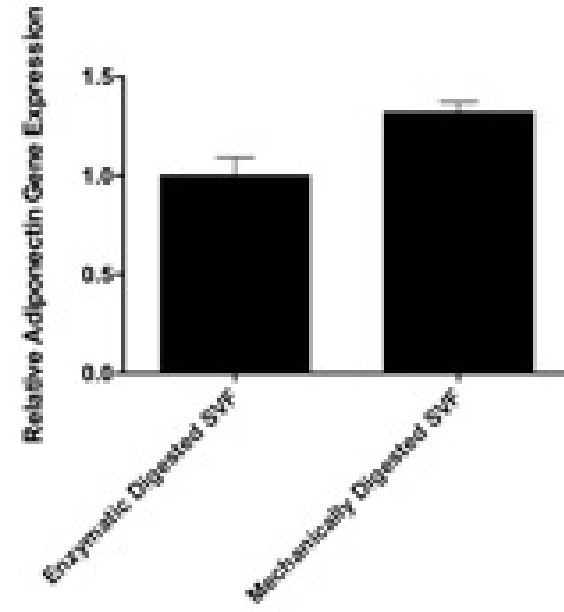

**Enzyme Isolation**

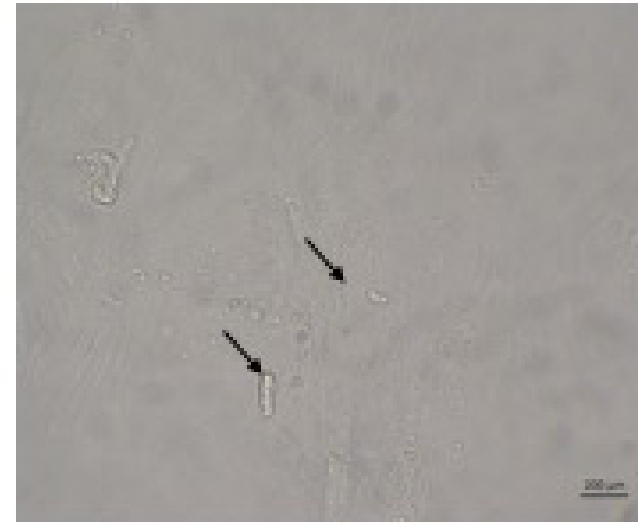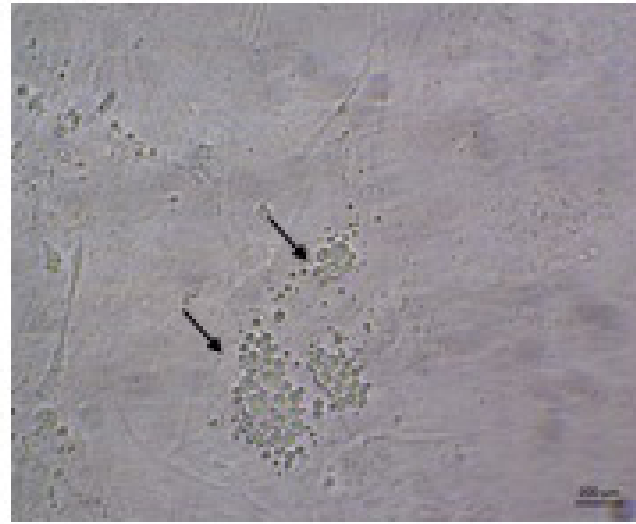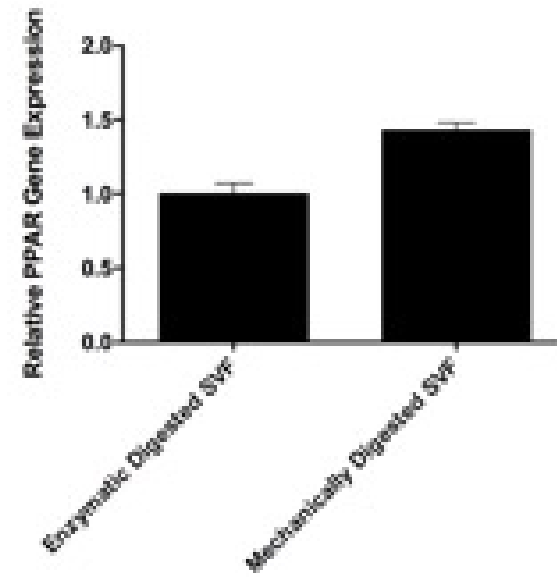

Supplement: gox-8-e2652-s004.pdf [file gox-8-e2652-s004.pdf]
